# Supplementary material for: TOR acts as a metabolic gatekeeper for auxin‐dependent lateral root initiation in Arabidopsis thaliana
Source: PubMed Central journal article supplement — EMBO J. 2023 Apr 6;42(10):e111273. doi: 10.15252/embj.2022111273 (PMC10183831; doi:10.15252/embj.2022111273), 2023-04-06
Supplement: EMBJ-42-e111273-s009.pdf [file EMBJ-42-e111273-s009.pdf]

## Expanded View Figures

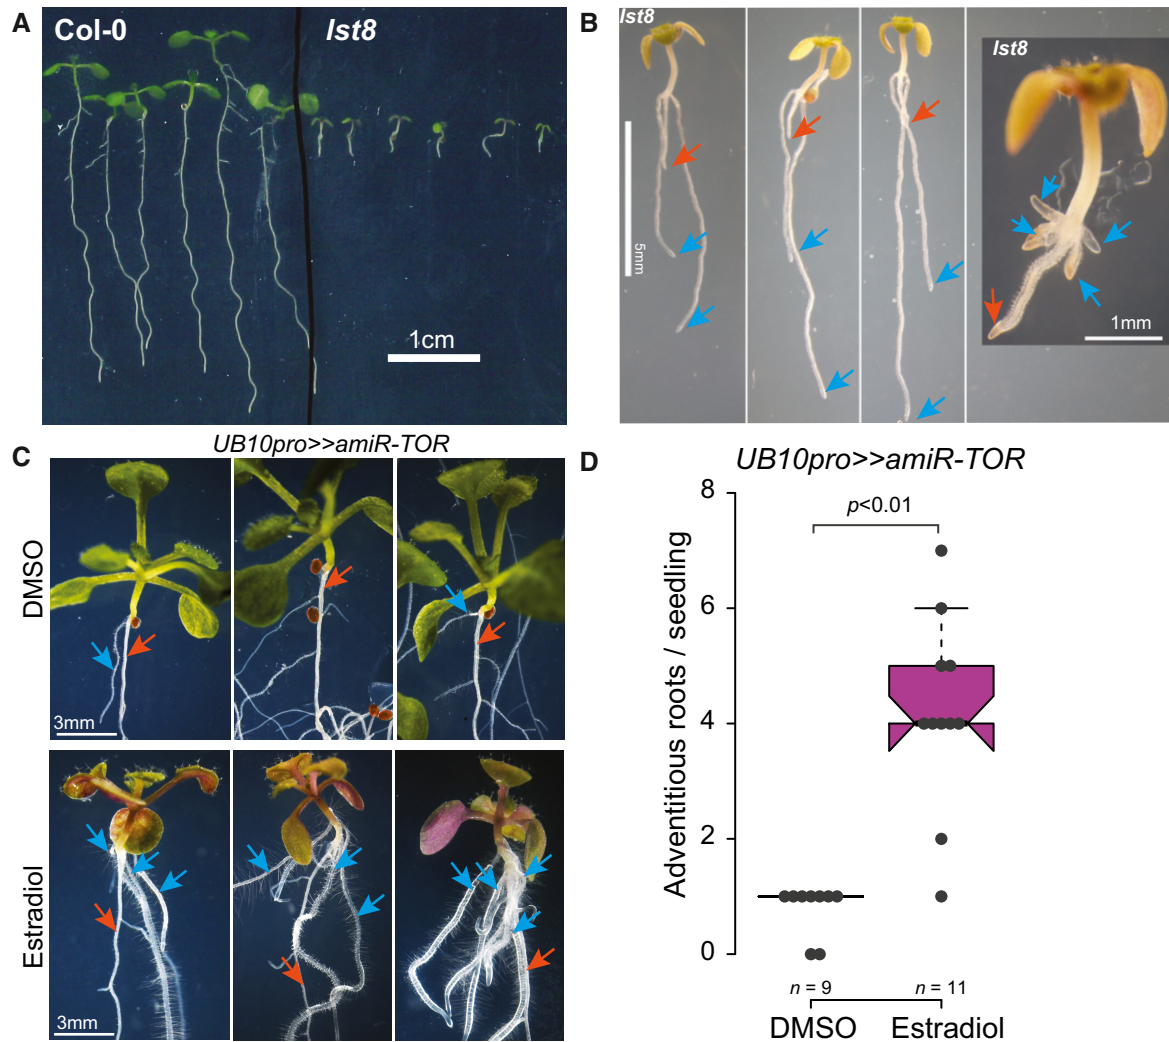

**Figure EV1. Impairment of the TOR machinery causes the increased formation of adventitious roots.**

- A Primary root growth in 14-day-old *Ist8* seedlings is reduced compared to Col-0.
- B Close-ups of 14-day-old *Ist8* seedlings with numerous adventitious roots (blue arrows) on the hypocotyl; the primary root is indicated with a red arrow.
- C TOR knockdown induces the formation of adventitious roots. 14-day-old *UB10pro>>amiR-TOR* seedlings transferred at 8 DAG to Est develop more adventitious roots from the hypocotyl (blue arrows) than DMSO-treated seedlings. The red arrows indicate the primary root.
- D Distribution of the number of hypocotyl-borne adventitious roots produced in 14-day-old *UB10pro>>amiR-TOR* seedlings transferred at 8 DAG to Est or DMSO. The number of biological replicates is indicated. Unpaired t-test.

Source data are available online for this figure.

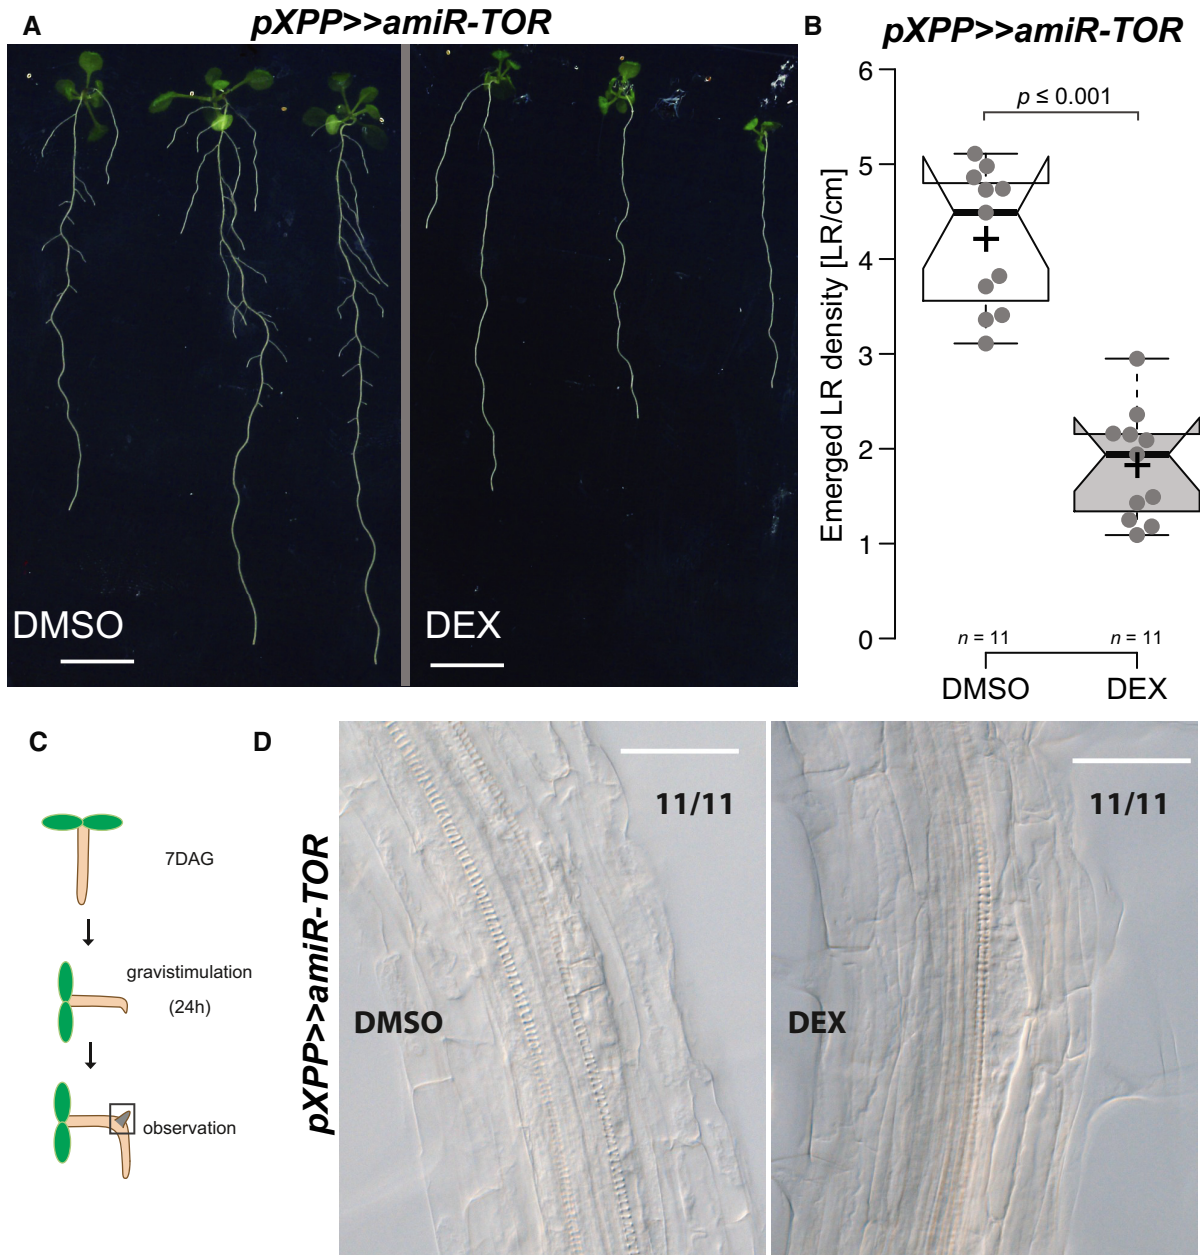

**Figure EV2. Xylem-pole-pericycle specific knockdown of TOR expression impairs the emergence of LR primordia.**

A Phenotype of *pXPP>>amiR-TOR* seedlings grown on DMSO or 30  $\mu$ M Dexamethasone (DEX) at 14 DAG. Scale bar: 5 mm.

B Density of emerged LR in *pXPP>>amiR-TOR* upon control or DEX treatment in 14-day-old seedlings.

C Schematic of the experimental setup used for scoring LR initiation by gravistimulation for 24 h, upon control or DEX treatment.

D Representative DIC images of root bends of 7DAG *pXPP>>>>amiR-TOR* seedlings raised on (DMSO) or DEX and subsequent 24 h gravistimulation. Numbers indicate the proportion of root bends with the depicted phenotype. Scale bar: 50  $\mu$ m.

Source data are available online for this figure.

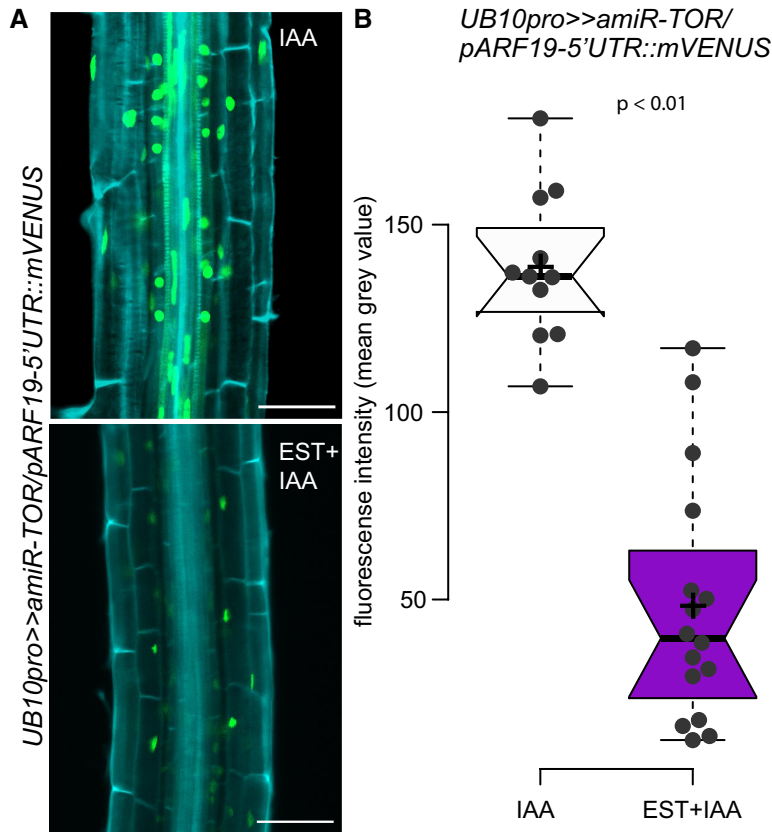

**Figure EV3. Silencing TOR-expression reduces ARF19 in TOR-deficient pericycle cells after synchronized LR-induction.**

**A** Representative confocal images of mVenus accumulation in 7 DAG *UB10pro>>amiR-TOR/ pARF19-5'UTR::mVENUS* seedlings. Seedlings were pre-treated for 24 h with mock (DMSO) or 10  $\mu$ M  $\hat{O}$ -Estradiol to induce TOR knockdown and then transferred to 10  $\mu$ M IAA to induce LR formation synchronously. Scale bar: 50  $\mu$ m,  $n \geq 11$  individual roots.

**B** Quantification of mean gray values in the nuclei of the pericycle cells. Significant differences between mVenus-signal of 10  $\mu$ M IAA treated seedlings either DMSO or Est pre-treated roots based on paired t-test.

Source data are available online for this figure.
