# Supplementary material for: TOR acts as a metabolic gatekeeper for auxin‐dependent lateral root initiation in Arabidopsis thaliana
Source: PubMed Central journal article supplement — EMBO J. 2023 Apr 6;42(10):e111273. doi: 10.15252/embj.2022111273 (PMC10183831; doi:10.15252/embj.2022111273), 2023-04-06
Supplement: EMBJ-42-e111273-s011.pdf [file EMBJ-42-e111273-s011.pdf]

Appendix for  
**TOR acts as a metabolic gatekeeper for auxin-dependent lateral root initiation  
in *Arabidopsis thaliana***

Michael Stitz, David Kuster, Maximilian Reinert, Mikhail Schepetilnikov, Béatrice Berthet, Jazmin Reyes-Hernández, Denis Janocha, Anthony Artins, Marc Boix, Rossana Henriques, Anne Pfeiffer, Jan Lohmann, Emmanuel Gaquerel and Alexis Maizel

- Appendix Figure S1. Lateral root deficiency leads to starch hyperaccumulation in leaves. page 2
- Appendix Figure S2. Comparable starch content in foliage at the end of the light period in plants producing LR or not. page 3
- Appendix Figure S3. Glucose and Sucrose levels in shoots of IAA-treated Col-0 and *slr* seedlings. page 4
- Appendix Figure S4. Auxin/*slr*-dependent signaling reconfigures the carbon metabolism-related transcriptome during LR formation is influenced. page 5
- Appendix Figure S5. TOR over-activation leads to longer primary roots, whereas impairment of the TOR machinery results in reduced primary root length. page 6
- Appendix Figure S6. Silencing efficiency in *UB10pro>>amiR-TOR* line. page 7
- Appendix Figure S7. IAA or external carbohydrate sources in TOR-deficient seedlings can not rescue lateral root formation. page 8
- Appendix Figure S8. Foliar accumulation of starch upon TOR silencing. page 9
- Appendix Figure S9. Transcriptome analysis upon auxin-induced induction of lateral root formation in *UB10pro>>amiR-TOR*. page 10
- Appendix Figure S10. Expression of *TOR*, *GATA23*, and *ARF7* transcripts upon inhibition of TOR via AZD8055. page 11
- Appendix Figure S11. IAA-responsive genes detected during ribosome profiling and TOR inhibition IAA induced in the RNA-seq experiment under TOR deficiency vastly overlap. page 12
- Appendix Figure S12. *WOX11* expression upon TOR-knockdown or TOR inhibition. page 13

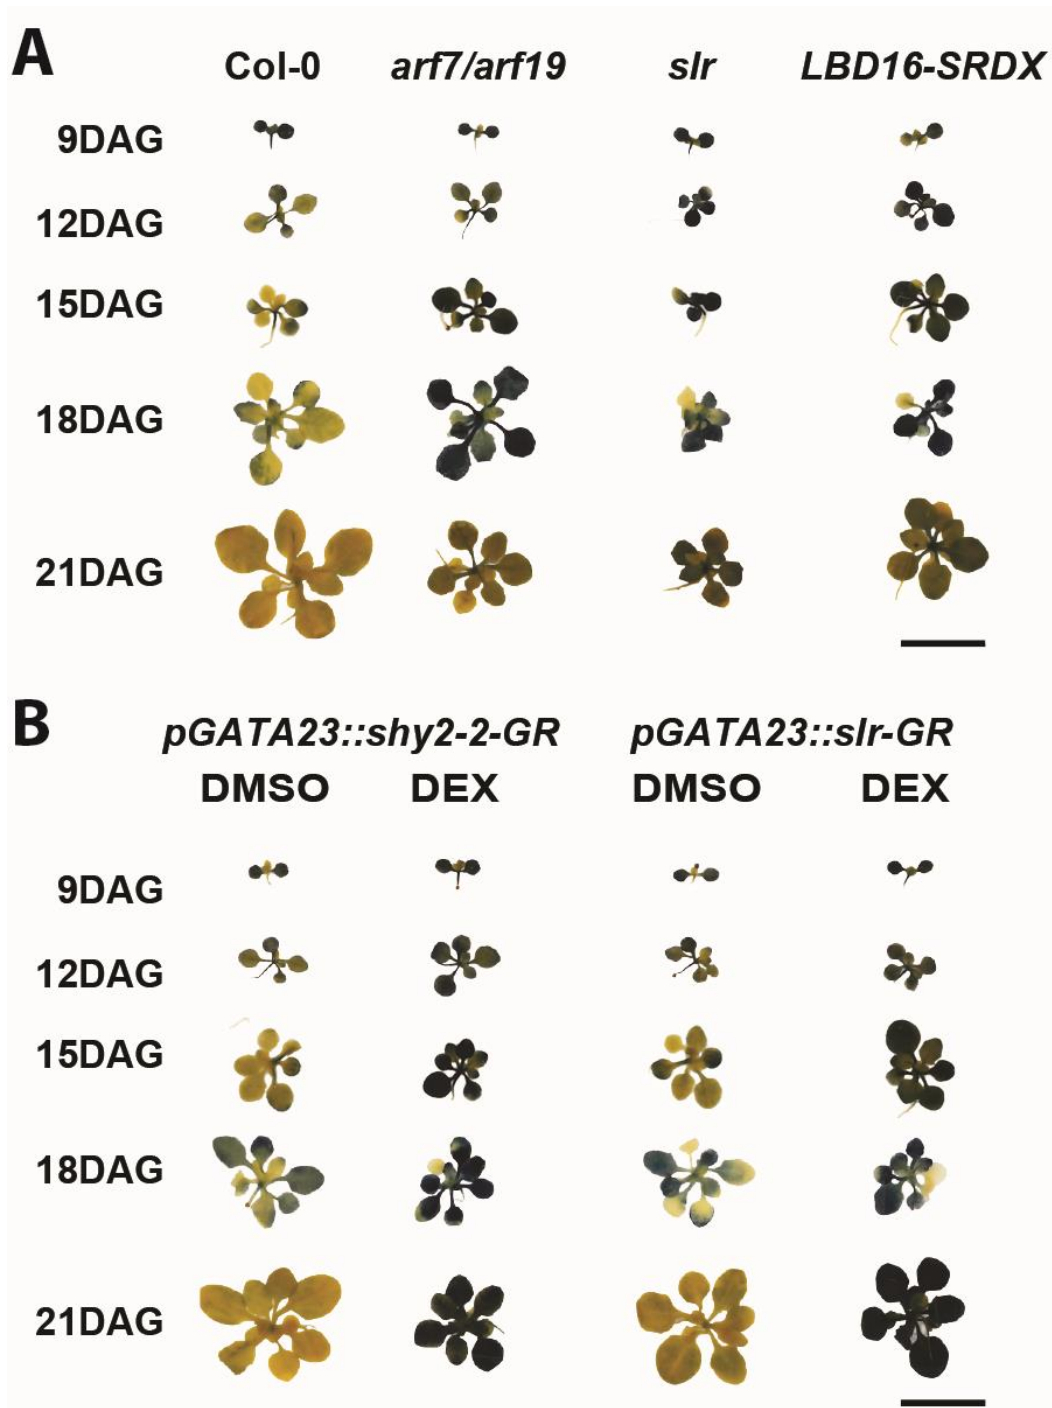

**Appendix Figure S1. Lateral root deficiency leads to starch hyperaccumulation in leaves.**

**A.** Representative images of rosettes of seedlings stained with a Lugol's Iodine solution for starch accumulation at the indicated day after germination (DAG) in Col-0, *arf7/arf19*, *slr*, and *gLBD16-SRDX*.

**B.** In the inducible lateral rootless lines, *pGATA23::shy2-2-GR* and *pGATA23::slr1-GR* grown on control medium (DMSO) starch staining resemble Col-0, while those devoid of LR's grown on Dexamethasone (DEX, 10µM) show the intense starch staining observed for LR-less mutants in (A) from the 9 to 21 DAG. Scale bar: 1 cm.

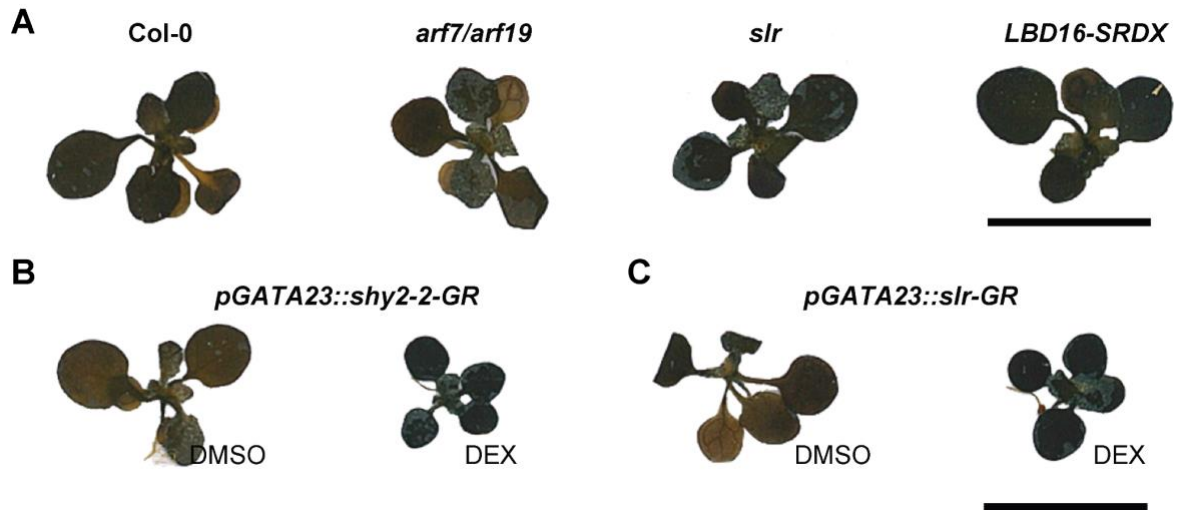

**Appendix Figure S2. Comparable starch content in foliage at the end of the light period in plants producing LR or not.**

**A.** Representative scanning images of rosettes of seedlings stained with a Lugol's Iodine solution for starch accumulation 15 days after germination (DAG) at the end of the light phase in *Col-0*, *arf7/arf19*, *slr*, and *gLBD16-SRDX*.

**B.** In the inducible lateral rootless lines, *pGATA23::shy2-2-GR* and *pGATA23::slr1-GR* grown on DMSO control medium or grown on 10 μM Dexamethasone (DEX, 10 μM) show comparably intense starch staining as observed for LR-less mutants and *Col-0* in (A). Scale bar: 1 cm.

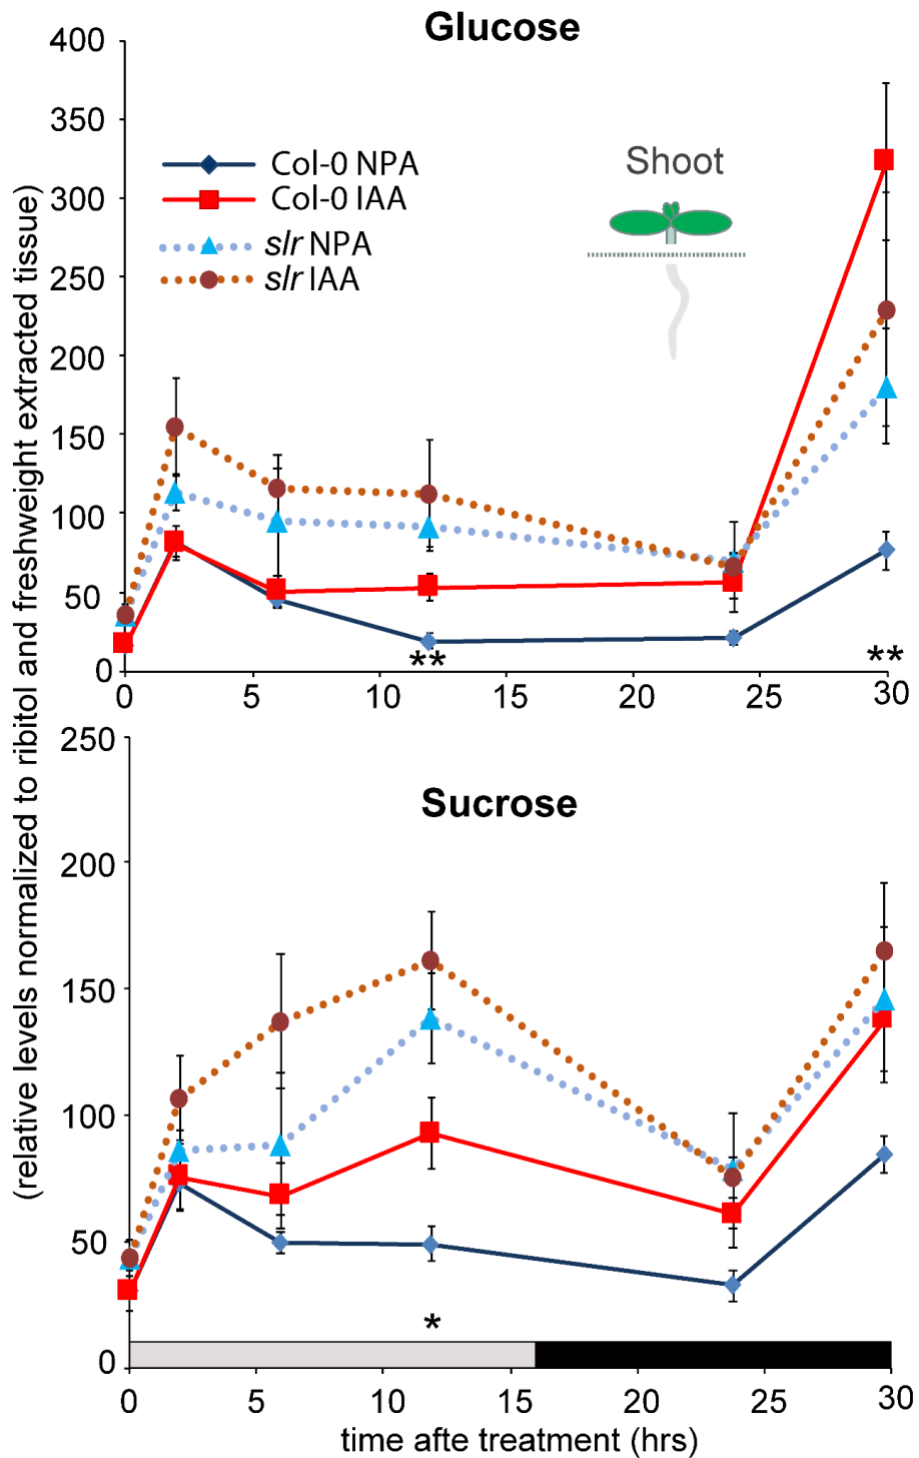

**Appendix Figure S3. Glucose and Sucrose levels in shoots of IAA-treated Col-0 and *slr* seedlings.**

The plots depict the levels of glucose and sucrose in shoot tissues of Col-0 (solid lines) and *slr* (dashed lines) at the indicated time after IAA application. Values are means ( $\pm$  SE,  $n=5$  biological replicates) of relative levels normalized to the ribitol internal standard and per mg fresh weight. Asterisks indicate significant differences between NPA-treated control conditions and auxin (IAA) induced root tissues (unpaired t-test; \* =  $p < 0.05$ , \*\* =  $p < 0.001$ ). The shoot metabolomics data are summarised in File EV1.

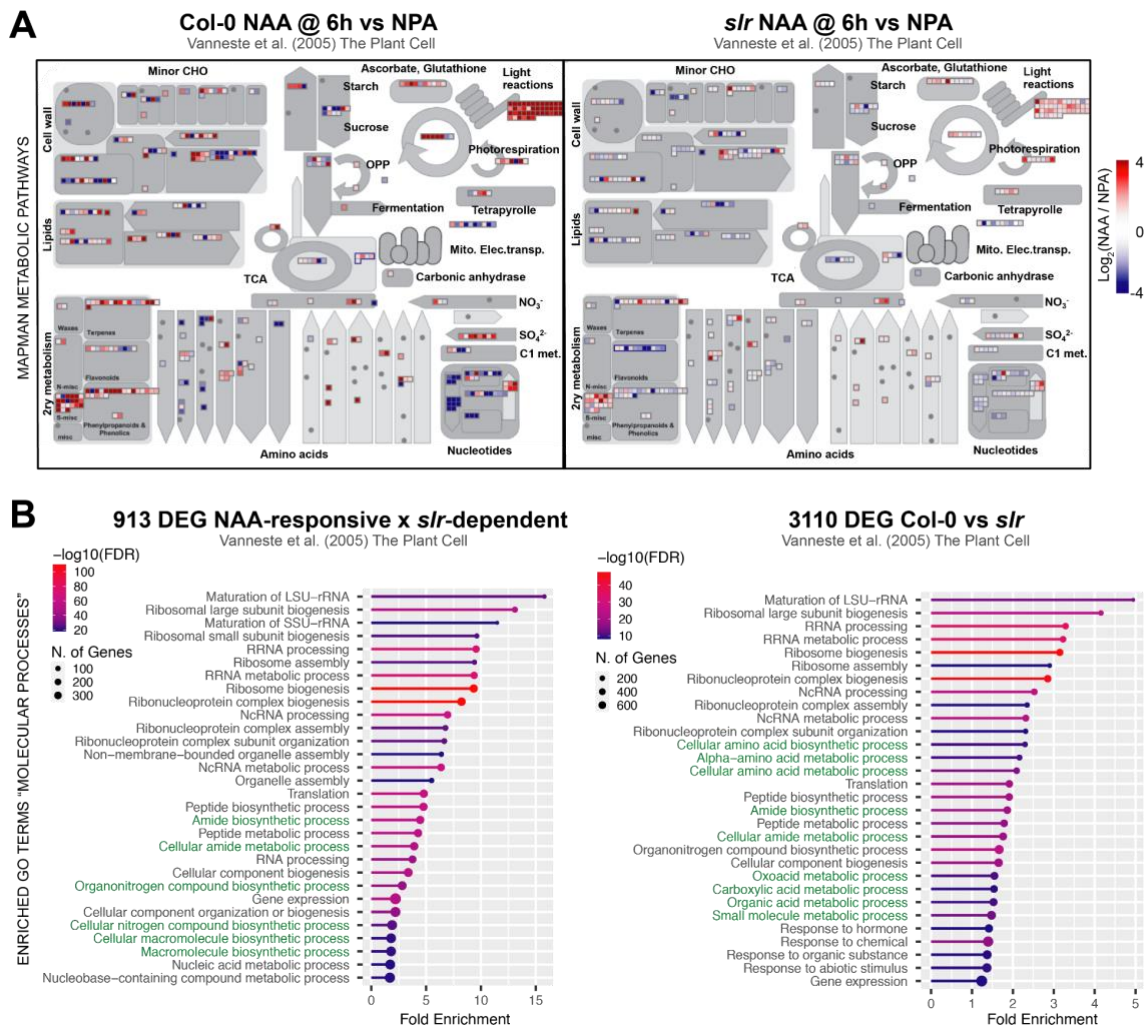

**Appendix Figure S4. Auxin/*slr*-dependent signaling reconfigures the carbon metabolism-related transcriptome during LR formation is influenced.**

**A.** MAPMAN-based overview of fold-change ( $\log_2$ -transformed) reconfigurations of central carbon metabolism-related transcripts from root segments of Col-0 and *slr* mutant seedlings after 6h of transfer from NPA to the auxin analog NAA ( $\alpha$ -naphthaleneacetic acid).

**B.** DEG sets for the comparison of overall Col-0 vs. *slr* root transcriptomes (right panel) and specifically associated with an interactive NAA x *slr* effect (left panel) were extracted from the VisuaLRTC transcriptome/statistical data compendium by Parizot *et al.* (2010). Enrichment analyses for Molecular Processes GO terms were conducted using ShinyGO v0.75 (Ge *et al.*, 2019) with an FDR P-value cutoff of 0.5 and a maximum number of top pathways to show 30. Central carbon metabolism-related GO terms are highlighted in green. Original transcriptomics data for both analyses are from Vanneste *et al.* (2005) pioneer exploration of auxin-/*slr*-dependent root transcriptomics responses during synchronized LR induction.

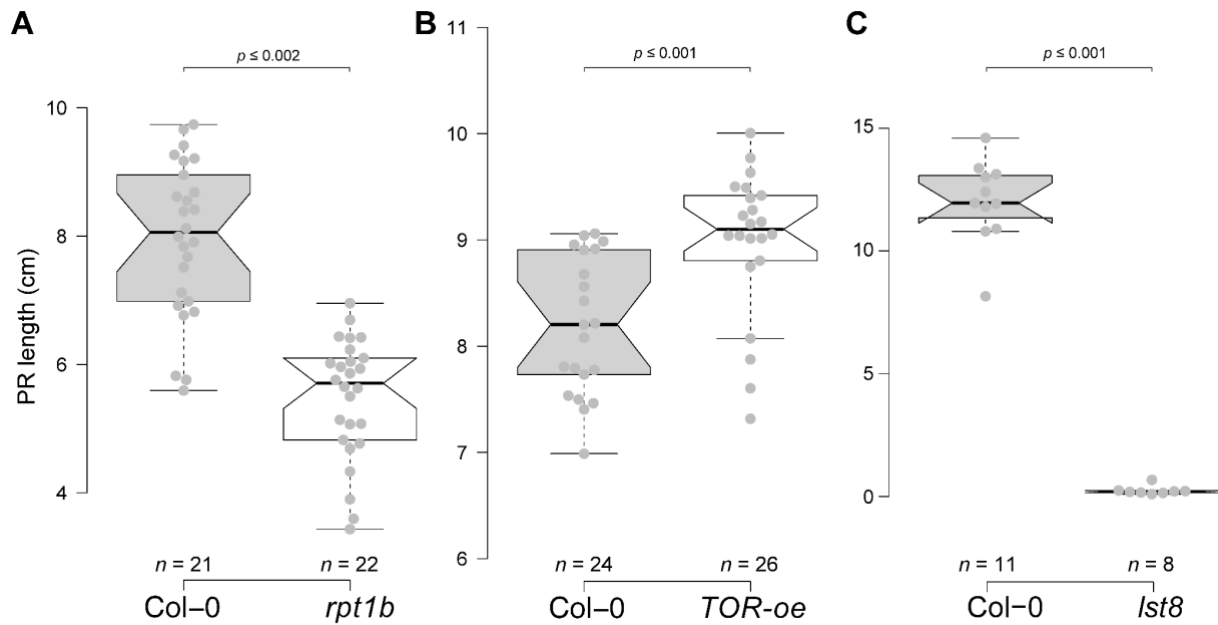

**Appendix Figure S5. TOR over-activation leads to longer primary roots, whereas impairment of the TOR machinery results in reduced primary root length.**

- A. 14-day-old *TOR-oe* seedlings (GK548) show significantly longer primary roots than Col-0 ( $p \leq 0.002$ ) when grown on  $\frac{1}{2}$  MS media containing 110mM Sucrose. (unpaired *t*-test).
- B. 14-day-old *rpt1b* seedlings show significantly shorter primary roots than Col-0 ( $p \leq 0.001$ ).
- C. *lst8* seedlings at 18 DAG show strongly impaired primary root growth. (unpaired *t*-test)

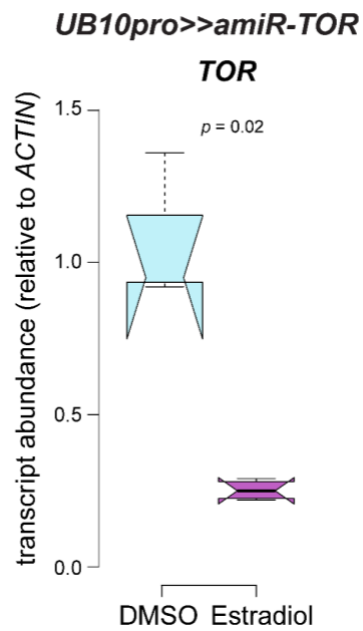

**Appendix Figure S6. TOR silencing in *UB10pro>>amiR-TOR***

Root tissues of *UB10pro>>amiR-TOR* plants grown for 24 h on ½ MS media containing 10 µM β-Estradiol have significantly lower TOR-mRNA levels than *UB10pro>>amiR-TOR* control plants grown for 24 h on ½ MS media containing DMSO control solution ( $n=4$  biological replicates, unpaired  $t$ -test).

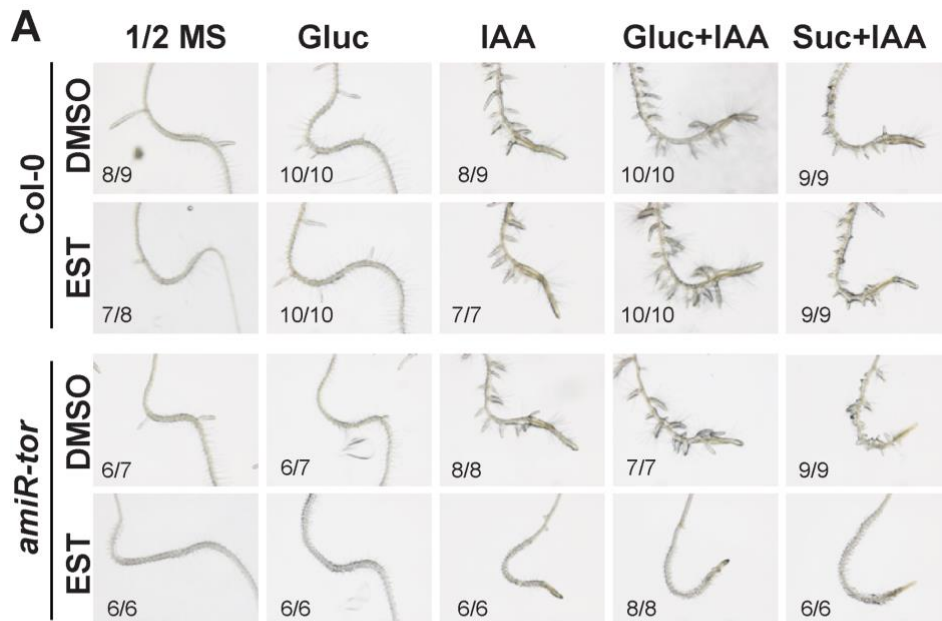

**B**

**Percentage of Rootbends producing LR**

| Treatment | Col-0 |     | amiR-tor |     |
|-----------|-------|-----|----------|-----|
|           | DMSO  | EST | DMSO     | EST |
| 1/2 MS    | 86    | 88  | 86       | 0   |
| Gluc      | 100   | 100 | 86       | 0   |
| IAA       | 100   | 100 | 100      | 0   |
| Gluc+IAA  | 100   | 100 | 100      | 0   |
| Suc+IAA   | 100   | 100 | 100      | 0   |

**Appendix Figure S7. IAA or external carbohydrate sources in TOR-deficient seedlings can not rescue lateral root formation.**

**A.** Representative images of Col-0 and *UB10pro>>amiR-TOR* roots after 72h after rescue with 2% Glucose, 10  $\mu$ M IAA, 2% Glucose + 10  $\mu$ M IAA, or 2% Sucrose + 10  $\mu$ M IAA. Before transfer to the rescue media, seedlings were pre-treated for 24h with either DMSO or 10  $\mu$ M  $\beta$ -Estradiol.

**B.** Quantification of the LR-rescue in *UB10pro>>amiR-TOR* seedlings.



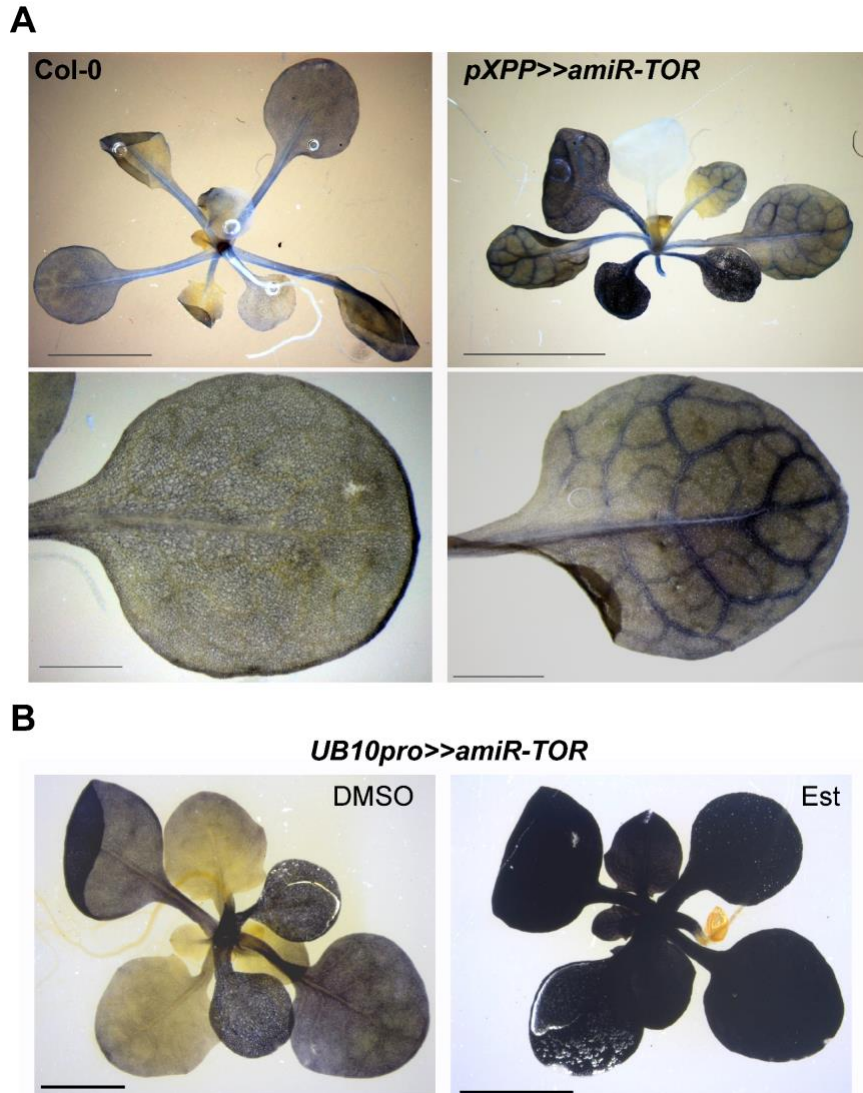

**Appendix Figure S8. Foliar accumulation of starch upon TOR silencing.**

**A.** Starch staining in leaves of the *pXPP>>amiR-TOR* line. 12 DAG seedlings of *pXPP>>amiR-TOR* plants grown on DEX for 48h specifically accumulate starch in the vasculature of leaves. Scale bars: upper panel: 5mm, lower panel: 1 mm).

**B.** Starch staining in leaves of the *UB10pro>>amiR-TOR* line. 14DAG *UB10pro>>amiR-TOR* plants grown for 48hrs on Estradiol accumulate starch throughout the foliage, compared to DMSO-grown controls.

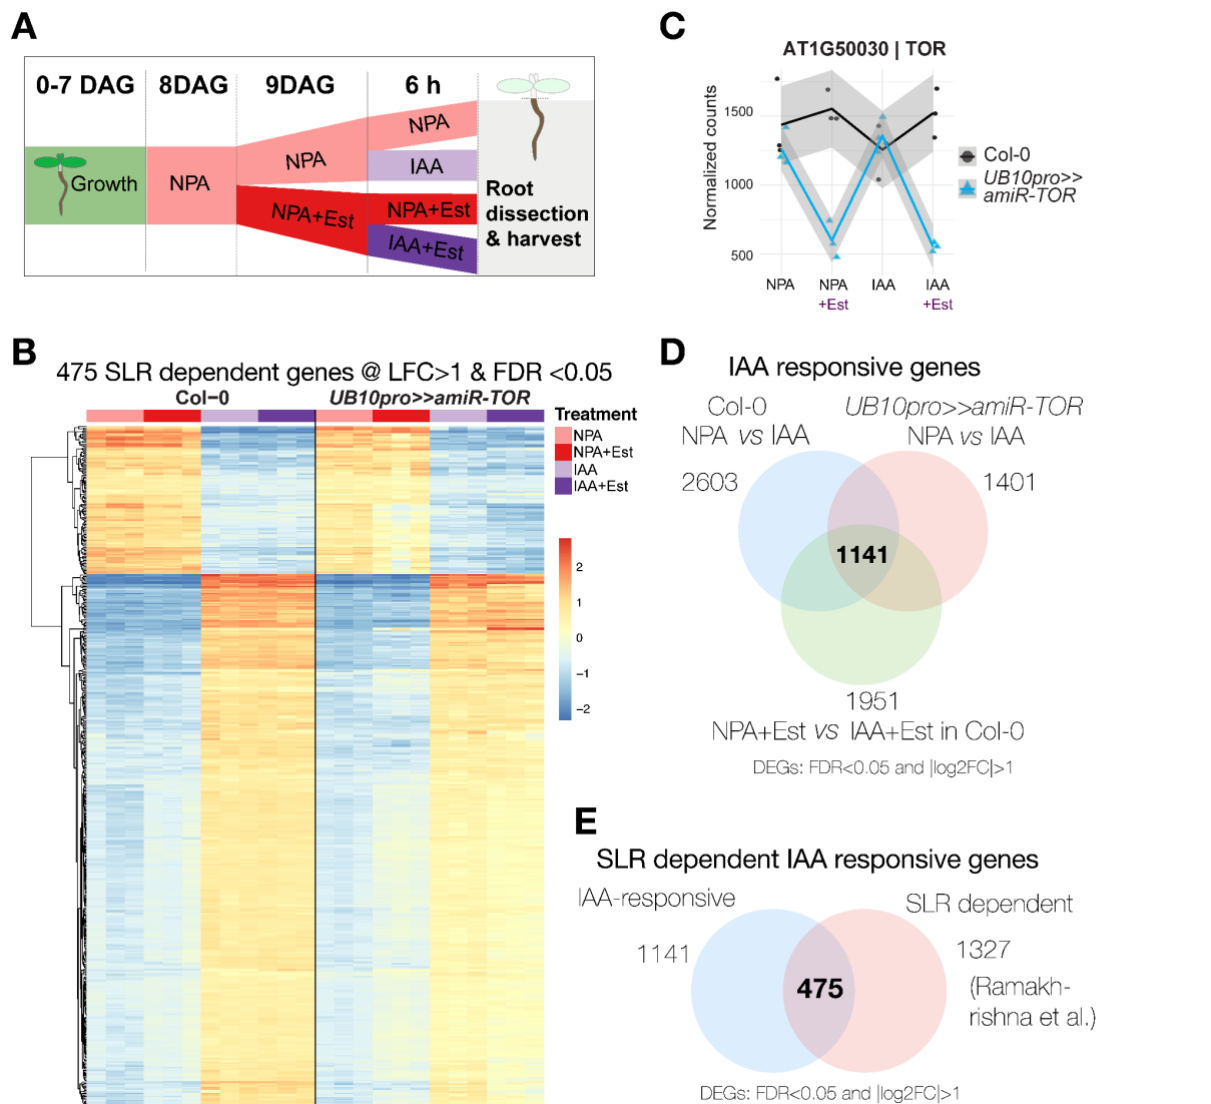

**Appendix Figure S9. Transcriptome analysis upon auxin-induced induction of lateral root formation in *UB10pro>>amiR-TOR*.**

**A.** Schematic depicting how samples for this RNA-seq data set were prepared.

**B.** Heatmap from a hierarchical clustering analysis (HCA) showing z-score normalized relative levels of 475 SLR-dependent genes in tissues +/- induced for LR-formation, and +/- induced for TOR-knockdown (One-way ANOVA, LFC>1 & FDR <0.05)

**C.** Extracted traces for RNAseq sample set shows reduction of TOR transcripts in samples generated from *UB10pro>>amiR-TOR* roots grown on Est containing media compared to control and Col-0 samples.

**D.** Venn-diagram of IAA-responsive genes with log 2-fold change >1 commonly and differentially expressed in Col-0 and *UB10pro>>amiR-TOR* after shifting from NPA to 10  $\mu$ M IAA, and Col-0 after the shift from NPA and Est to IAA and Est.

**E.** Venn diagram showing IAA-responsive genes commonly and differentially expressed in Col-0 and *UB10pro>>amiR-TOR* 6h and Col-0 after the shift from NPA and Est to IAA and Est.

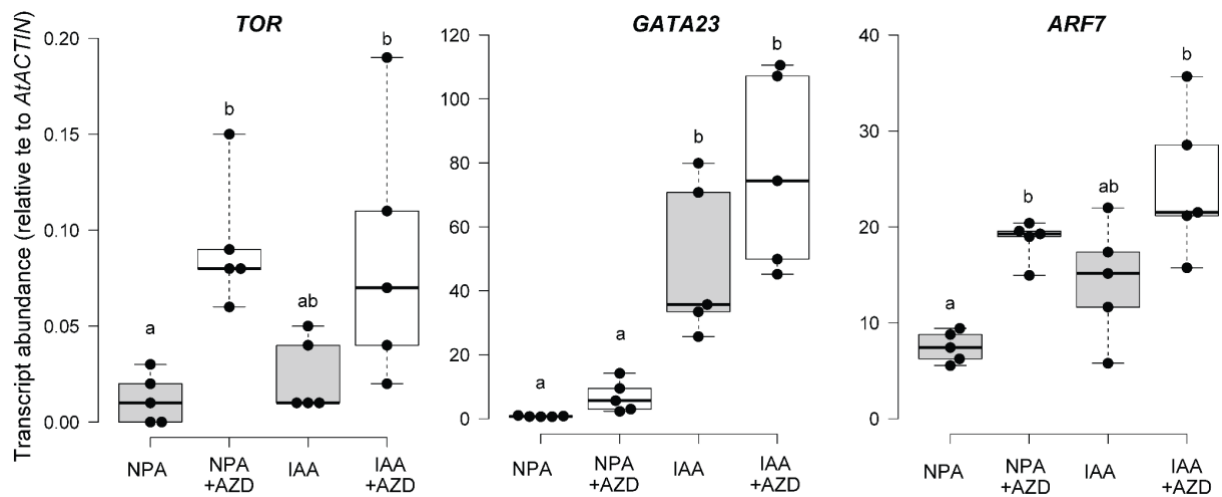

**Appendix Figure S10. Expression of TOR, GATA23, and ARF7 transcripts upon inhibition of TOR via AZD8055.**

TOR's relative expression levels (normalized to ACTIN) are increased by AZD8055, while GATA23 and ARF7 are not reduced by TOR inhibition. Comparison between samples was performed by one-way ANOVA. Different letters indicate significant differences based on a posthoc Tukey HSD Test ( $\alpha = 0.05$ ),  $n=5$  biological replicates.

IAA responsive genes in transcriptome  
and translome profiling

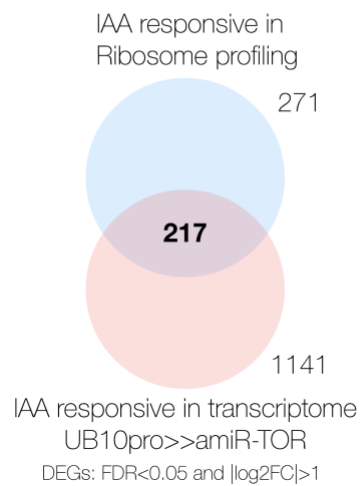

**Appendix Figure S11. IAA-responsive genes detected during ribosome profiling and TOR inhibition IAA induced in the RNA-seq experiment under TOR deficiency vastly overlap.** Venn-diagram showing IAA-responsive genes commonly and differentially expressed 6h of IAA application in Col-0 after previous AZD8055 inhibition of TOR and *UB10pro>>amiR-TOR* on Est.

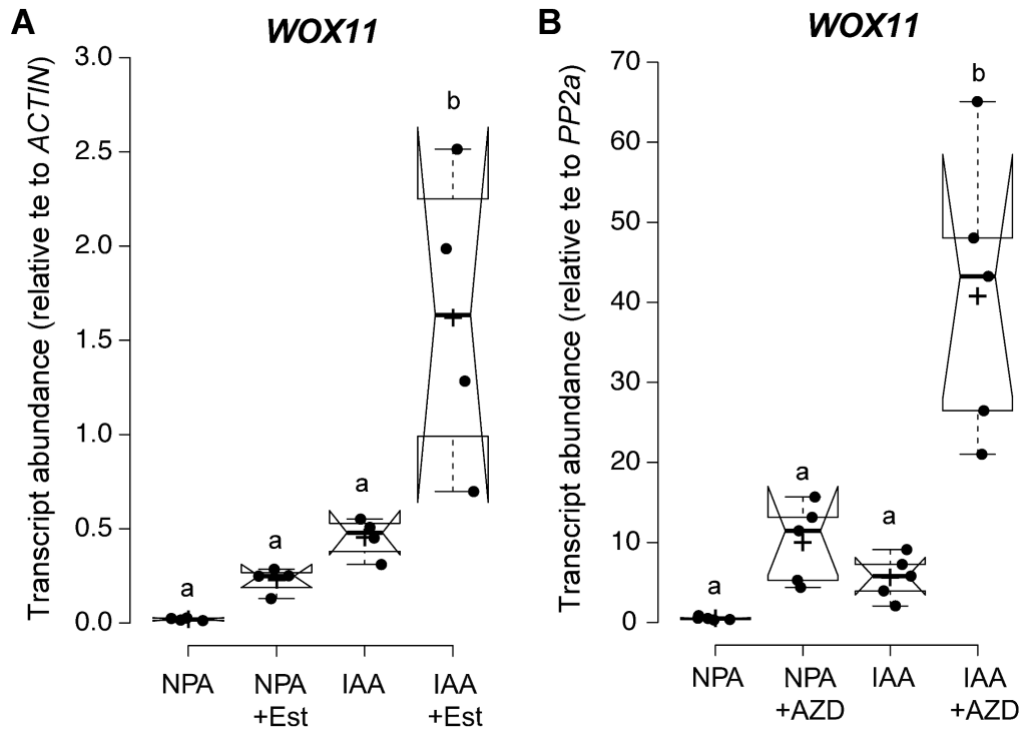

**Appendix Figure S12. WOX11 expression upon TOR-knockdown or TOR inhibition.**

The abundance of WOX11 transcripts is increased 6hrs after LR induction by 10 $\mu$ M IAA in RT-q-PCR samples of *UB10pro>>amiR-TOR* after TOR-knock-down (A) as well as in Col-0 samples after TOR-inhibition by 10  $\mu$ M AZD8055 (B). Comparison between samples was performed by one-way ANOVA. Different letters indicate significant differences based on a post-hoc Tukey HSD Test ( $\alpha = 0.05$ , A,  $n=3$ ; B,  $n=4$ ; C,  $n=5$  biological replicates).
